# Supplementary material for: A family of 3D UO22+–5-X-1,3-dicarboxylate (X = –H, –NO2, –NH2, –OH) hybrid materials: structural relevance with variation of substituent groups and photochemical properties
Source: Royal Society of Chemistry journal article supplement (doi:10.1039/c4ce02307b), 2015-01-01
Supplement: c4ce02307b1.pdf [file c4ce02307b1.pdf]

## Supplementary materials

**A family of 3D  $\text{UO}_2^{2+}$ -5-X-1,3-dicarboxylate (X = -H, -NO<sub>2</sub>, -NH<sub>2</sub>, -OH) hybrid materials: structural relevance with a variation of substituent group and photochemical properties**

**XIANG-SHENG ZHAI, WEN-GANG ZHU, WEI XU, YA-JING HUANG, YUE-QING ZHENG\***

*Crystal Engineering Lab, Research Center for Solid State Chemistry & Application,  
Ningbo University, Ningbo, 315211 P. R. China*

*Telefax: Int. +574/87600747*

*E-mail:*

*[yqzhengmc@163.com](mailto:yqzhengmc@163.com)*

**Figure S1.** The experimental and the simulated XRD patterns based on the structural analysis for **2** and **4**.

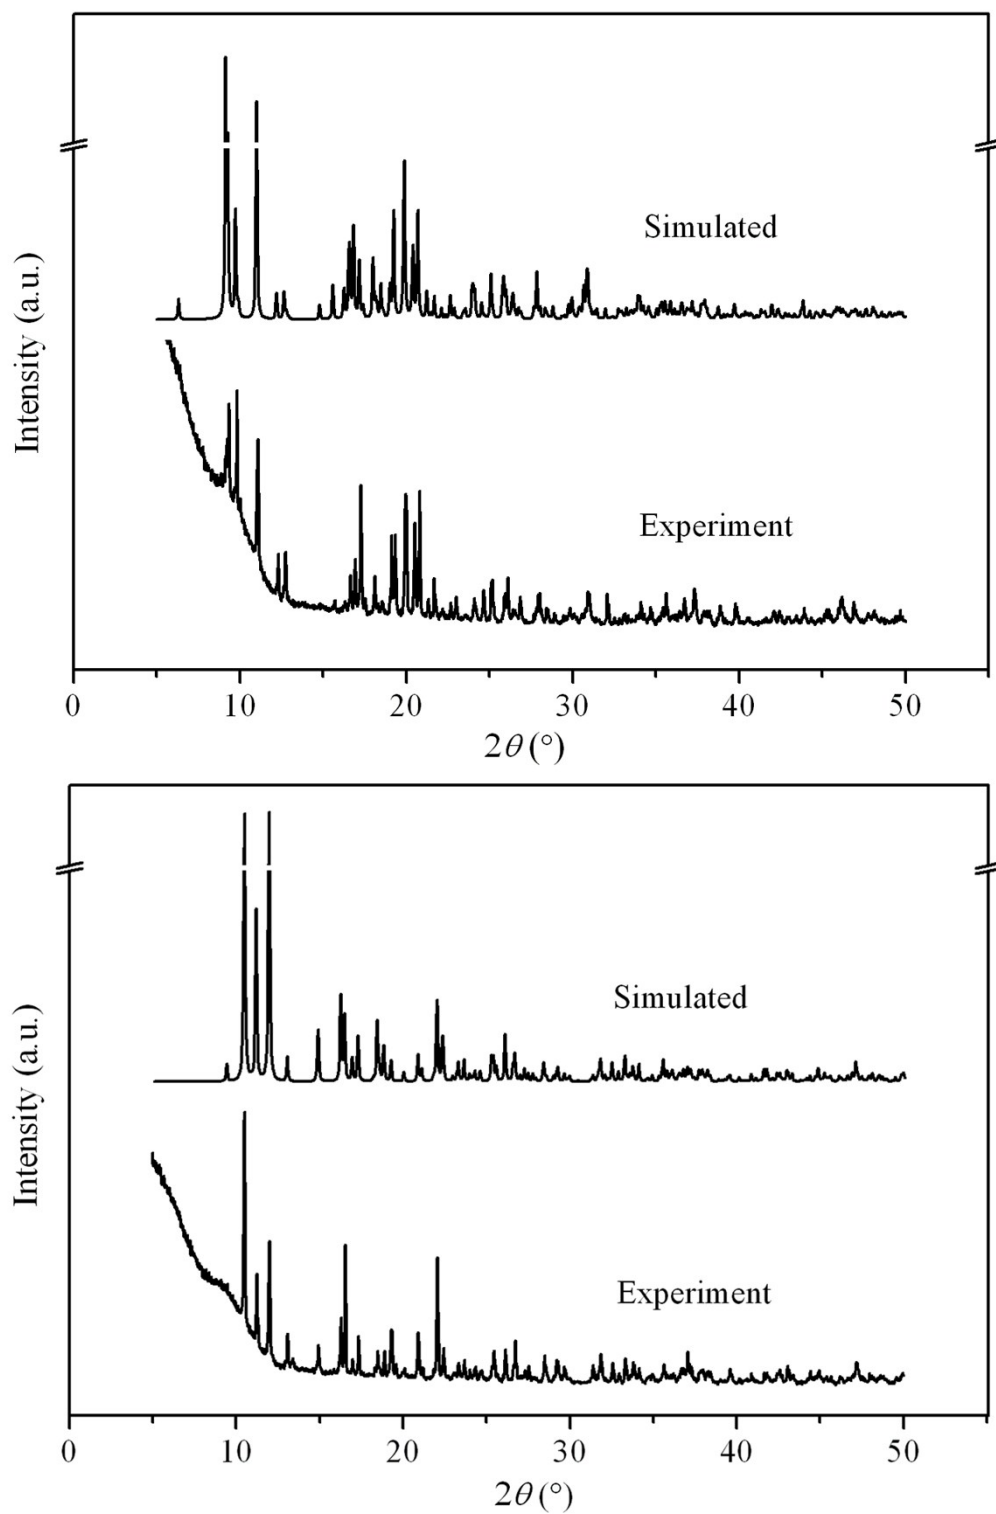

**Figure S2.** The IR spectrum for complexes **2** and **4** and the bulk products of compounds **1** and **3**.

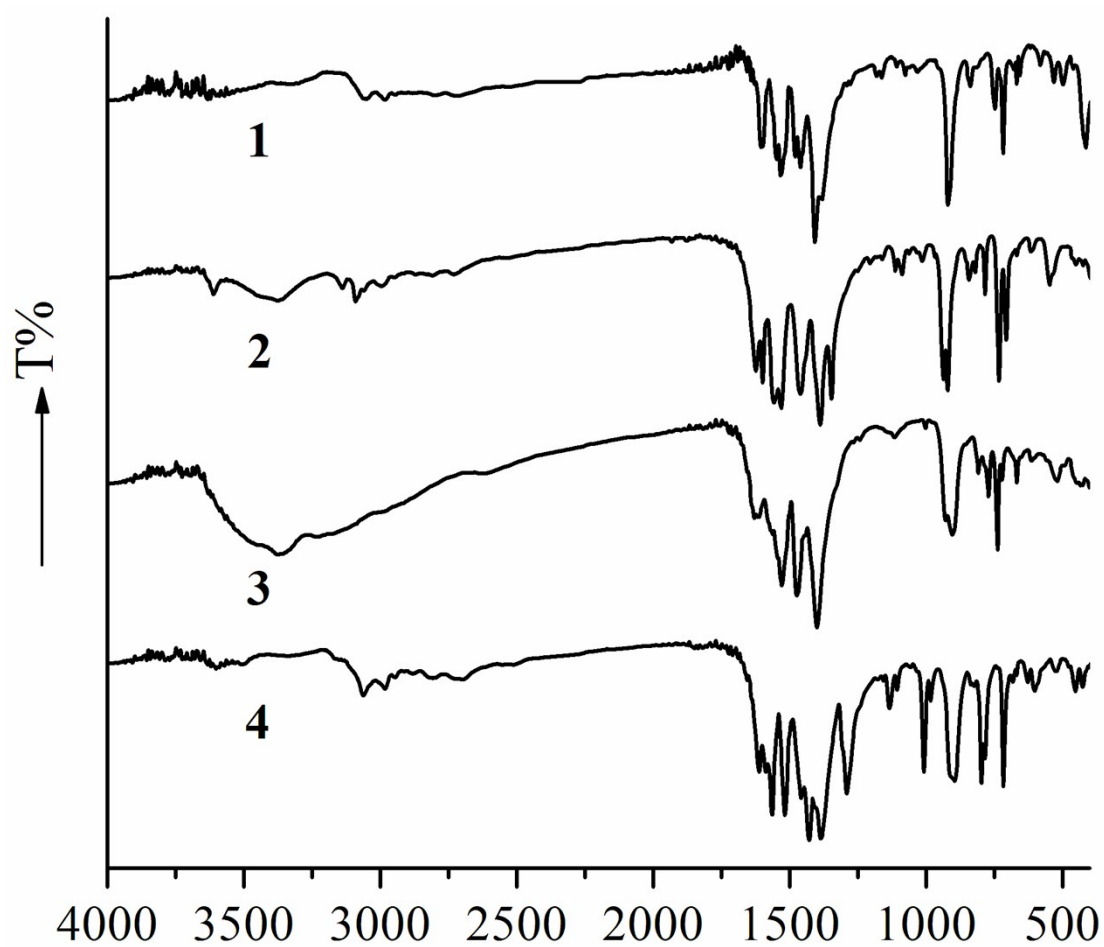

**Figure S3.** (a) 3D architecture of **1** viewed in [110] direction. (b) Schematic view of the net topology of **1** viewed in [110] direction. (c) 3D architecture of **1** viewed in [001] direction. (b) Schematic view of the net topology of **1** viewed in [001] direction.

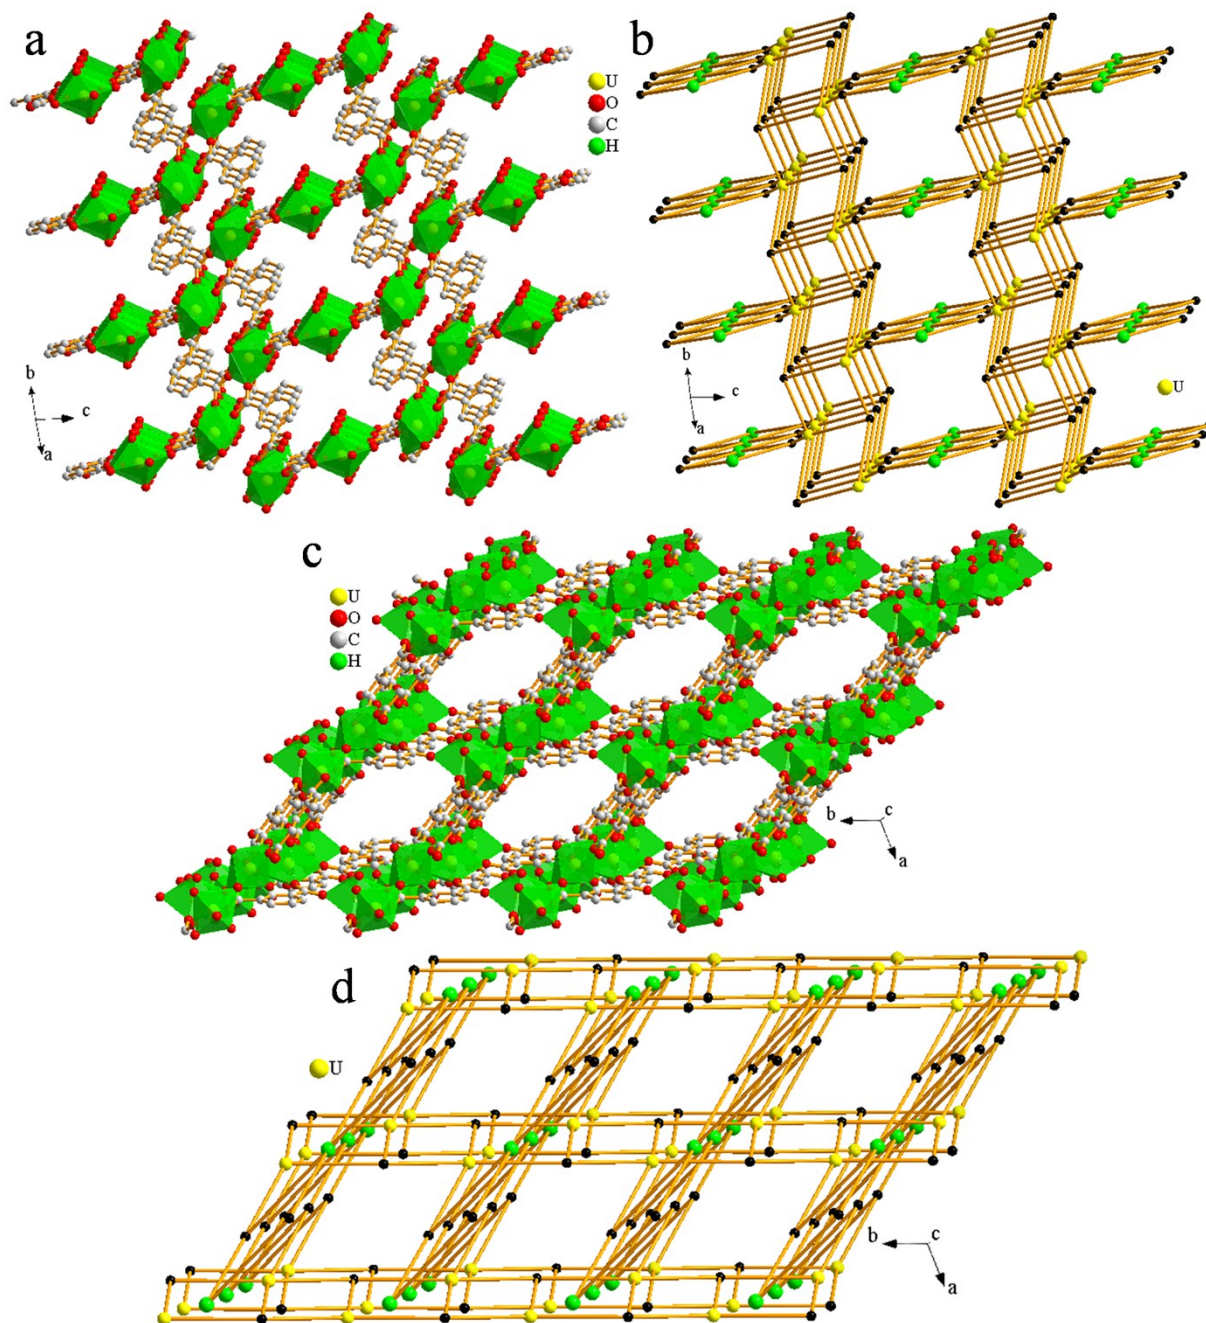

**Figure S4.** (a) 3D architecture of **2** viewed in  $[110]$  direction. (b) 3D architecture of **2** viewed in  $[001]$  direction.

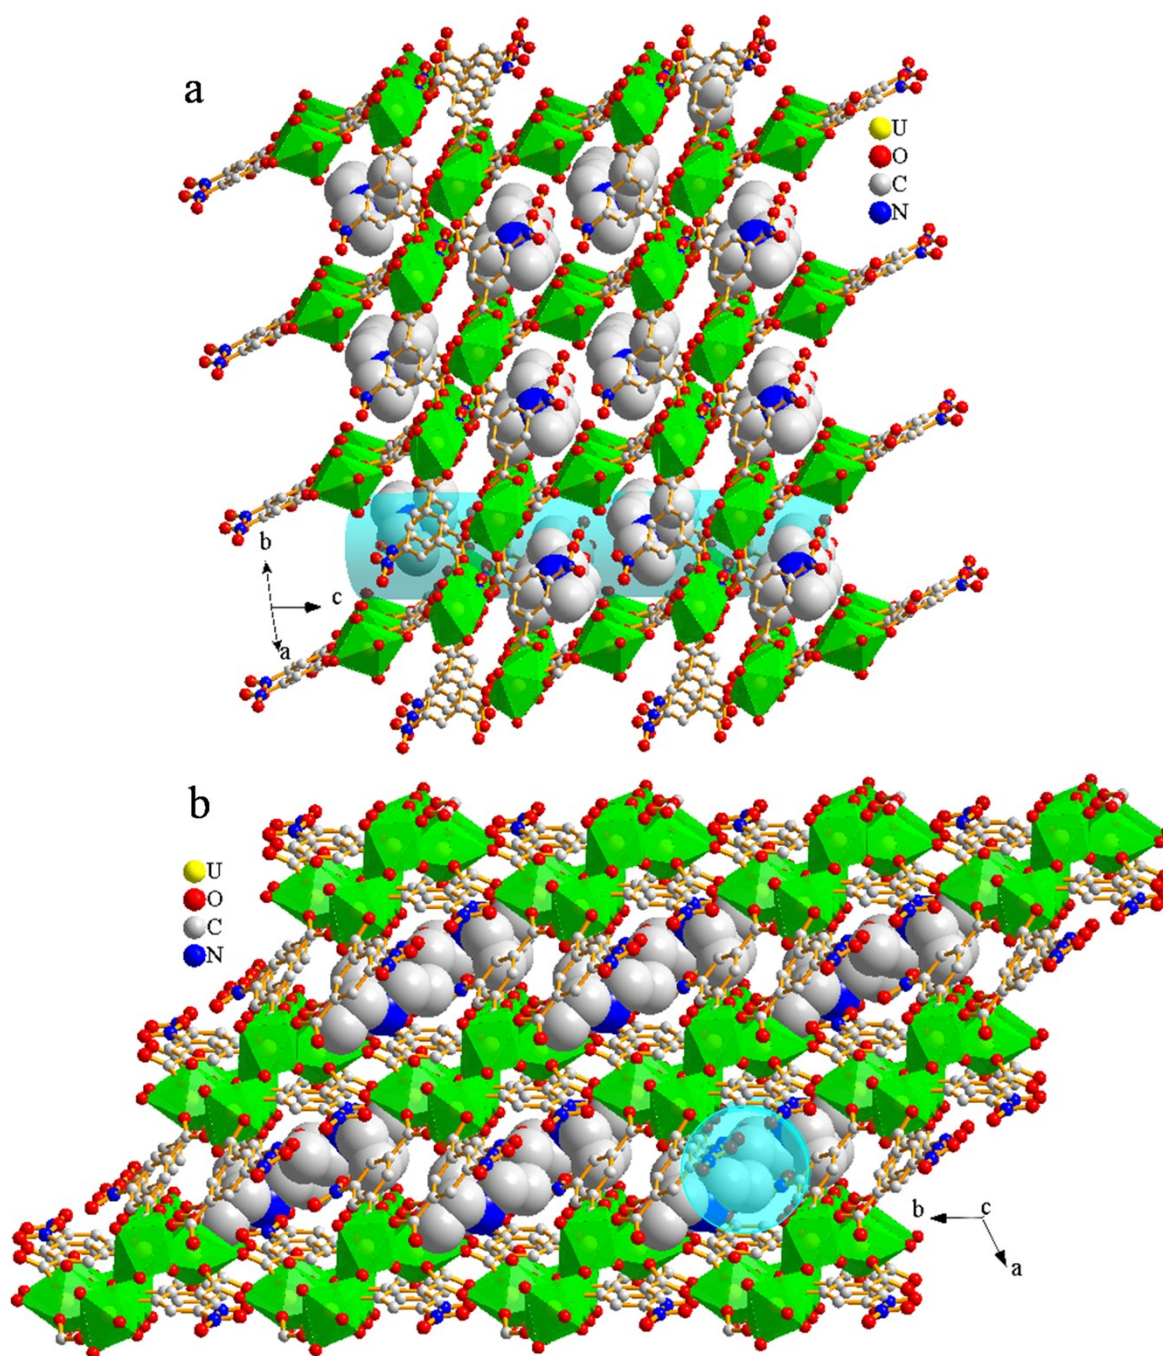

**Figure S5.** (a) 3D architecture of **3** viewed in  $[110]$  direction. (b) 3D architecture of **3** viewed in  $[001]$  direction.

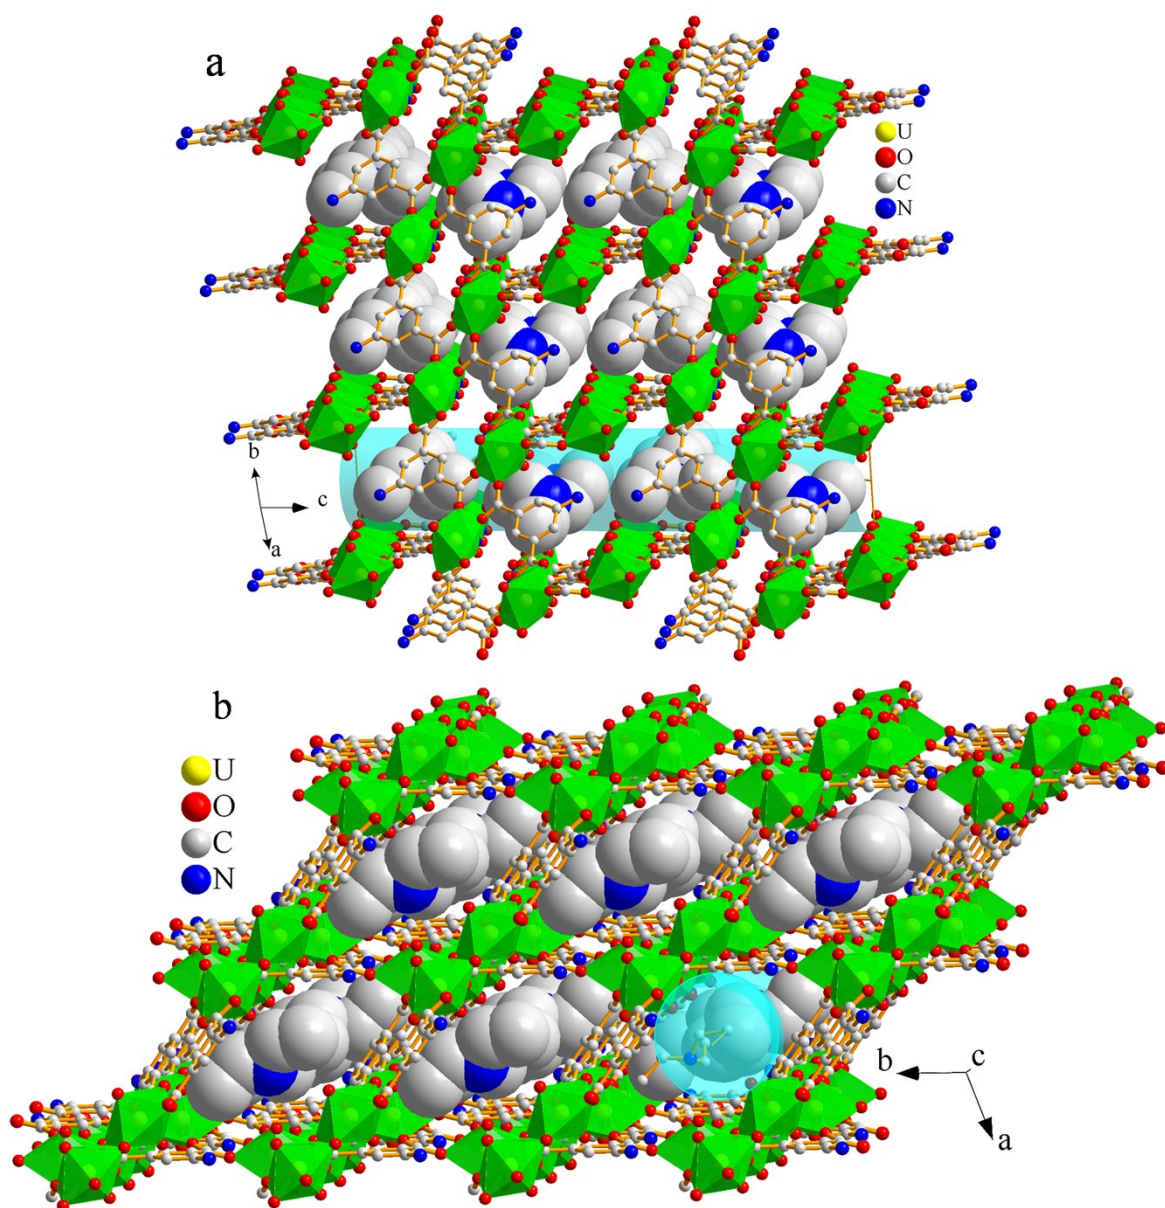

**Figure S6.** (a) 3D architecture of **4** viewed in  $[010]$  direction. (b) 3D architecture of **4** viewed in  $[001]$  direction. (c) Schematic view of the net topology of **4** viewed in  $[010]$  direction. (d) Schematic view of the net topology of **4** viewed in  $[001]$  direction.

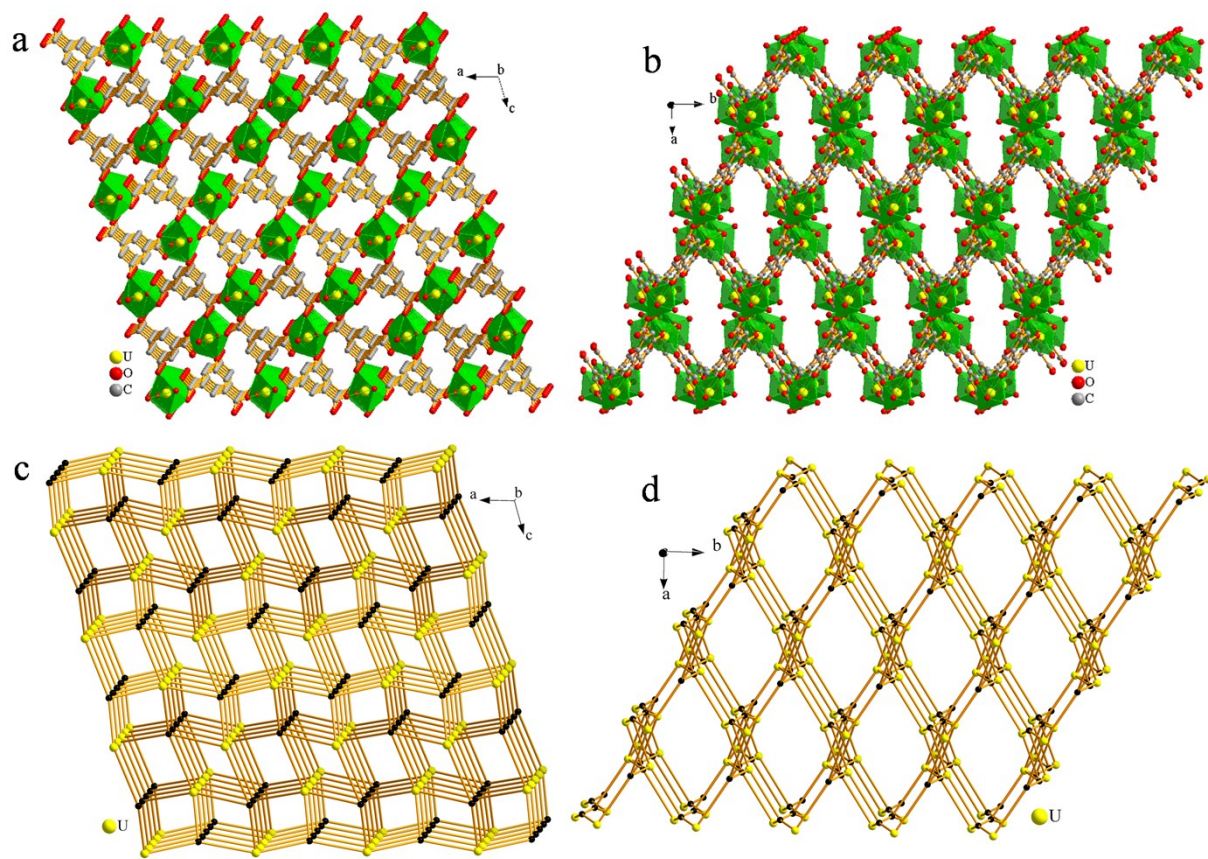

**Figure S7.** Solid-state reflectance spectra for **2** and **4**.

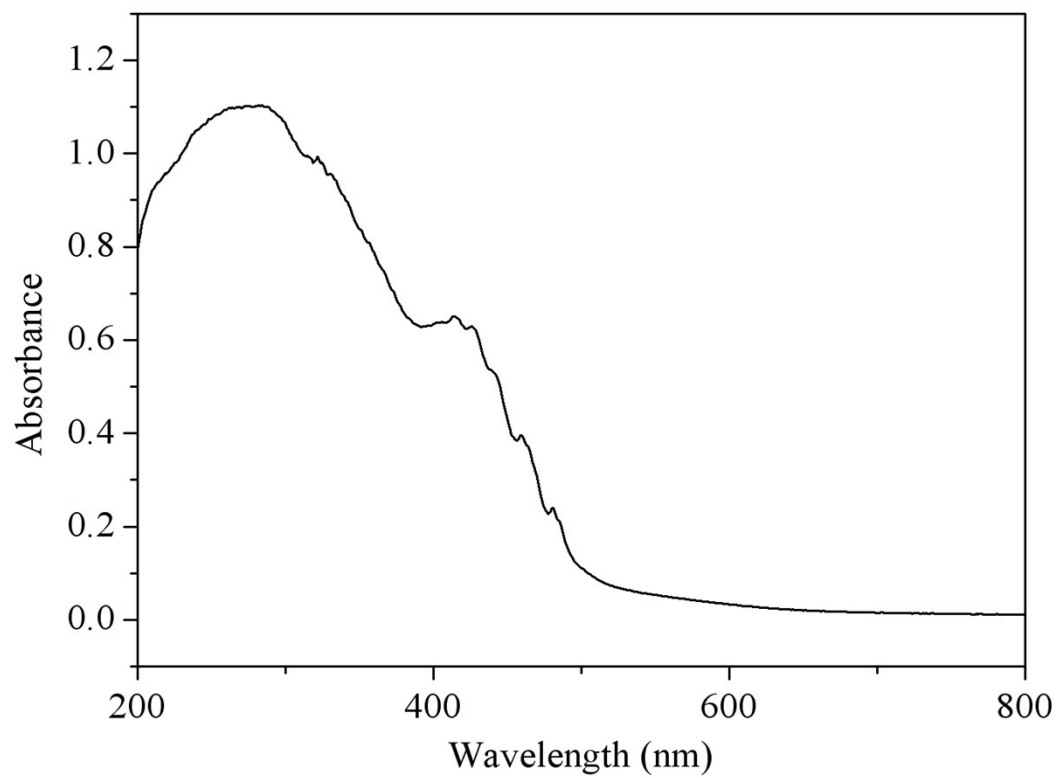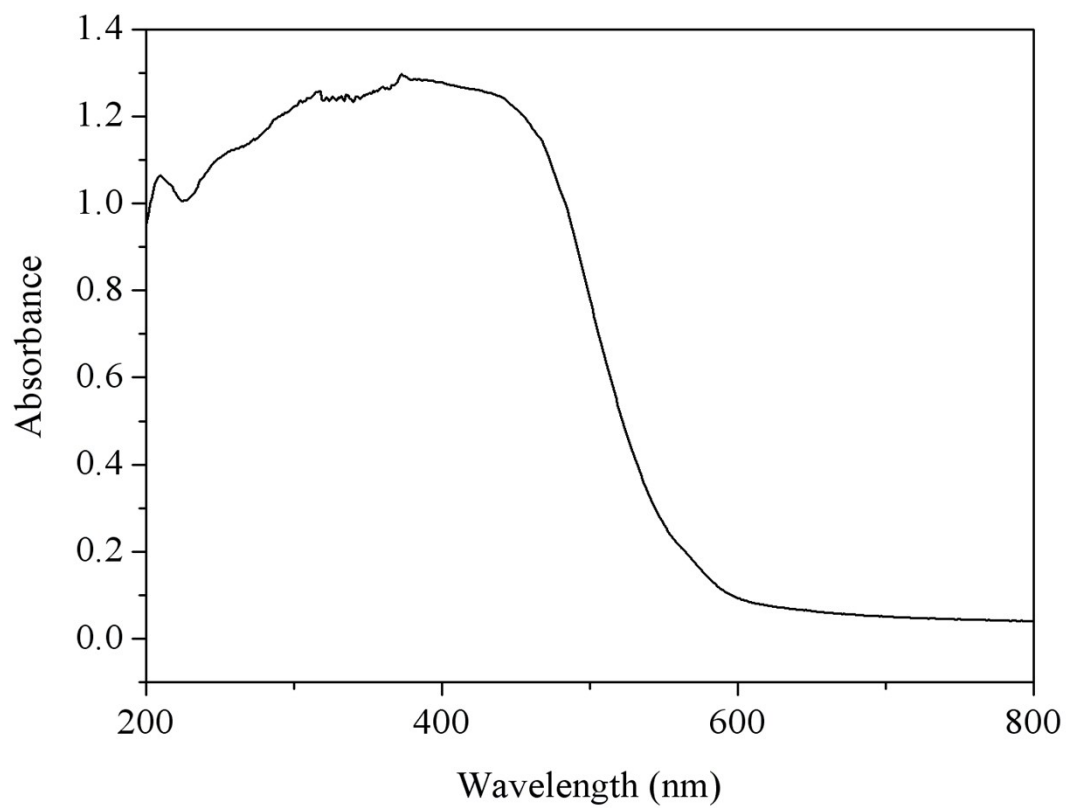







**Table S1** Selected Interatomic Distances (Å) and Bond Angles (°) for **1<sup>a</sup>**

|                        |           |                                       |           |                                        |           |
|------------------------|-----------|---------------------------------------|-----------|----------------------------------------|-----------|
| U1–O1                  | 1.734(8)  | U1–O6 <sup>#2</sup>                   | 2.304(10) | U2–O9 <sup>#3</sup>                    | 2.334(9)  |
| U1–O2                  | 1.717(11) | U1–O12                                | 2.301(9)  | U2–O10                                 | 2.457(9)  |
| U1–O3                  | 2.453(7)  | U2–O7                                 | 1.730(13) | U2–O11                                 | 2.458(9)  |
| U1–O4                  | 2.449(8)  | U2–O8                                 | 1.746(12) | U2–O13 <sup>#4</sup>                   | 2.314(13) |
| U1–O5 <sup>#1</sup>    | 2.322(9)  | U2–O9                                 | 2.321(8)  |                                        |           |
|                        |           |                                       |           |                                        |           |
| O1–U1–O2               | 179.3(5)  | O3–U1–O12                             | 74.8(3)   | O8–U2–O9 <sup>#3</sup>                 | 91.1(5)   |
| O1–U1–O3               | 86.5(4)   | O4–U1–O5 <sup>#1</sup>                | 154.4(3)  | O8–U2–O10                              | 90.7(4)   |
| O1–U1–O4               | 90.3(4)   | O4–U1–O6 <sup>#2</sup>                | 73.7(3)   | O8–U2–O11                              | 90.2(5)   |
| O1–U1–O5 <sup>#1</sup> | 87.8(4)   | O4–U1–O12                             | 127.9(3)  | O8–U2–O13 <sup>#4</sup>                | 91.1(6)   |
| O1–U1–O6 <sup>#2</sup> | 88.7(4)   | O5 <sup>#1</sup> –U1–O6 <sup>#2</sup> | 80.7(3)   | O9–U2–O9 <sup>#3</sup>                 | 70.1(4)   |
| O1–U1–O12              | 92.6(4)   | O5 <sup>#1</sup> –U1–O12              | 77.8(3)   | O9–U2–O10                              | 73.8(3)   |
| O2–U1–O3               | 94.0(4)   | O6 <sup>#2</sup> –U1–O12              | 158.3(3)  | O9–U2–O11                              | 126.4(3)  |
| O2–U1–O4               | 89.5(4)   | O7–U2–O8                              | 177.1(5)  | O9–U2–O13 <sup>#4</sup>                | 152.9(4)  |
| O2–U1–O5 <sup>#1</sup> | 92.1(4)   | O7–U2–O9                              | 91.4(5)   | O9 <sup>#3</sup> –U2–O10               | 143.9(3)  |
| O2–U1–O6 <sup>#2</sup> | 90.6(5)   | O7–U2–O9 <sup>#3</sup>                | 90.2(5)   | O9 <sup>#3</sup> –U2–O11               | 163.4(3)  |
| O2–U1–O12              | 88.1(5)   | O7–U2–O10                             | 89.9(5)   | O9 <sup>#3</sup> –U2–O13 <sup>#4</sup> | 82.9(4)   |
| O3–U1–O4               | 53.5(3)   | O7–U2–O11                             | 87.9(5)   | O10–U2–O11                             | 52.6(3)   |
| O3–U1–O5 <sup>#1</sup> | 151.6(3)  | O7–U2–O13 <sup>#4</sup>               | 86.5(6)   | O10–U2–O13 <sup>#4</sup>               | 133.1(4)  |
| O3–U1–O6 <sup>#2</sup> | 126.9(3)  | O8–U2–O9                              | 91.5(4)   | O11–U2–O13 <sup>#4</sup>               | 80.6(4)   |

<sup>a</sup> Symmetry codes: #1 = x, y–1, z; #2 = –x+2, –y+1, –z; #3 = –x, –y–1, –z+1; #4 = –x+1, –y, –z+1.

**Table S2** Selected Interatomic Distances (Å) and Bond Angles (°) for **2<sup>a</sup>**

|                           |          |                                       |          |                                         |                   |
|---------------------------|----------|---------------------------------------|----------|-----------------------------------------|-------------------|
| U1–O1                     | 1.778(5) | U1–O6 <sup>#2</sup>                   | 2.362(4) | U2–O13                                  | 2.445(4)          |
| U1–O2                     | 1.779(5) | U1–O11                                | 2.333(4) | U2–O14                                  | 2.492(4)          |
| U1–O3                     | 2.455(4) | U2–O9                                 | 1.781(5) | U2–O17                                  | 2.320(4)          |
| U1–O4                     | 2.472(4) | U2–O10                                | 1.780(5) | U2–O17 <sup>#4</sup>                    | 2.350(4)          |
| U1–O5 <sup>#1</sup>       | 2.304(4) | U2–O12 <sup>#3</sup>                  | 2.331(4) |                                         |                   |
|                           |          |                                       |          |                                         |                   |
| O1–U1–O2                  | 179.2(2) | O3–U1–O11                             | 73.0(1)  | O10–U2–O13                              | 88.4(2)           |
| O1–U1–O3                  | 89.5(2)  | O4–U1–O5 <sup>#1</sup>                | 75.0(2)  | O10–U2–O14                              | 92.5(2)           |
| O1–U1–O4                  | 89.7(2)  | O4–U1–O6 <sup>#2</sup>                | 158.3(1) | O10–U2–O17                              | 89.0(2)           |
| O1–U1–O5 <sup>#1</sup>    | 90.4(2)  | O4–U1–O11                             | 125.6(1) | O10–U2–O17 <sup>#4</sup>                | 91.2(2)           |
| O1–U1–O6 <sup>#2</sup>    | 88.5(2)  | O5 <sup>#1</sup> –U1–O6 <sup>#2</sup> | 83.4(2)  | O12 <sup>#3</sup> –U2–O13               | 77.8(1)           |
| O1–U1–O11                 | 93.3(2)  | O5 <sup>#1</sup> –U1–O11              | 159.1(2) | O12 <sup>#3</sup> –U2–O14               | 131.0(1)          |
| O2–U1–O3                  | 90.9(2)  | O6 <sup>#2</sup> –U1–O11              | 76.1(1)  | O12 <sup>#3</sup> –U2–O17               | 150.8(1)          |
| O2–U1–O4                  | 90.0(2)  | O9–U2–O10                             | 179.2(2) | O12 <sup>#3</sup> –U2–O17 <sup>#4</sup> | 80.1(1)           |
| O2–U1–O5 <sup>#1</sup>    | 88.6(2)  | O9–U2–O12 <sup>#3</sup>               | 91.6(2)  | O13–U2–O14                              | 53.3(1)           |
| O2–U1–O6 <sup>#2</sup>    | 91.6(2)  | O9–U2–O13                             | 91.0(2)  | O13–U2–O17                              | 131.2(1)          |
| O2–U1–O11                 | 87.6(2)  | O9–U2–O14                             | 87.3(2)  | O13–U2–O17 <sup>#4</sup>                | 157.9(1)          |
| O3–U1–O4                  | 52.8(1)  | O9–U2–O17                             | 91.7(2)  | O14–U2–O17                              | 78.2(1)           |
| O3–U1–O5 <sup>#1</sup>    | 127.8(1) | O9–U2–O17 <sup>#4</sup>               | 89.4(2)  | O14–U2–O17 <sup>#4</sup>                | 148.8(1)          |
| O3–U1–O6 <sup>#2</sup>    | 148.8(1) | O10–U2–O12 <sup>#3</sup>              | 88.0(2)  | O17–U2–O17 <sup>#4</sup>                | 70.9(2)           |
| Hydrogen bonding contacts |          |                                       |          |                                         |                   |
| D–H                       | d(D–H)   | d(H···A)                              | ∠DHA     | d(D···A)                                | A                 |
| O17–H171                  | 0.66     | 2.15                                  | 156      | 2.764                                   | O3 <sup>#5</sup>  |
| O18–H181                  | 0.84     | 2.27                                  | 149      | 3.020                                   | O8 <sup>#6</sup>  |
| O18–H182                  | 0.84     | 2.09                                  | 176      | 2.927                                   | O17 <sup>#7</sup> |
| N3–H31                    | 0.86     | 1.91                                  | 168      | 2.761                                   | O18               |

<sup>a</sup> Symmetry codes: #1 =  $-x+1, -y+1, -z+2$ ; #2 =  $x, y+1, z$ ; #3 =  $-x+2, -y+2, -z+1$ ; #4 =  $-x+3, -y+3, -z+1$ ; #5 =  $x+1, y+1, z$ ; #6 =  $-x+1, -y+1, -z+1$ ; #7 =  $x-1, y-1, z$ .

**Table S3** Selected Interatomic Distances (Å) and Bond Angles (°) for **3<sup>a</sup>**

|                           |          |                                       |           |                                         |                   |
|---------------------------|----------|---------------------------------------|-----------|-----------------------------------------|-------------------|
| U1–O1                     | 1.702(9) | U1–O6 <sup>#2</sup>                   | 2.314(7)  | U2–O10                                  | 2.441(9)          |
| U1–O2                     | 1.727(9) | U1–O12                                | 2.326(8)  | U2–O11 <sup>#3</sup>                    | 2.335(9)          |
| U1–O3                     | 2.463(8) | U2–O7                                 | 1.744(10) | U2–O13                                  | 2.329(8)          |
| U1–O4                     | 2.439(7) | U2–O8                                 | 1.725(11) | U2–O13 <sup>#4</sup>                    | 2.319(8)          |
| U1–O5 <sup>#1</sup>       | 2.335(9) | U2–O9                                 | 2.474(8)  |                                         |                   |
|                           |          |                                       |           |                                         |                   |
| O1–U1–O2                  | 179.0(4) | O3–U1–O12                             | 74.9(3)   | O8–U2–O10                               | 89.7(4)           |
| O1–U1–O3                  | 86.0(3)  | O4–U1–O5 <sup>#1</sup>                | 73.5(3)   | O8–U2–O11 <sup>#3</sup>                 | 92.1(4)           |
| O1–U1–O4                  | 91.1(3)  | O4–U1–O6 <sup>#2</sup>                | 153.6(3)  | O8–U2–O13                               | 92.6(4)           |
| O1–U1–O5 <sup>#1</sup>    | 90.5(4)  | O4–U1–O12                             | 127.3(3)  | O8–U2–O13 <sup>#4</sup>                 | 89.6(4)           |
| O1–U1–O6 <sup>#2</sup>    | 89.7(4)  | O5 <sup>#1</sup> –U1–O6 <sup>#2</sup> | 79.1(3)   | O9–U2–O10                               | 52.3(3)           |
| O1–U1–O12                 | 93.0(3)  | O5 <sup>#1</sup> –U1–O12              | 158.8(3)  | O9–U2–O11 <sup>#3</sup>                 | 80.8(3)           |
| O2–U1–O3                  | 93.1(4)  | O6 <sup>#2</sup> –U1–O12              | 79.9(3)   | O9–U2–O13                               | 164.9(3)          |
| O2–U1–O4                  | 88.1(3)  | O7–U2–O8                              | 177.7(4)  | O9–U2–O13 <sup>#4</sup>                 | 125.7(3)          |
| O2–U1–O5 <sup>#1</sup>    | 89.9(4)  | O7–U2–O9                              | 90.4(4)   | O10–U2–O11 <sup>#3</sup>                | 133.0(3)          |
| O2–U1–O6 <sup>#2</sup>    | 91.3(4)  | O7–U2–O10                             | 90.7(4)   | O10–U2–O13                              | 142.7(3)          |
| O2–U1–O12                 | 88.0(4)  | O7–U2–O11 <sup>#3</sup>               | 86.0(4)   | O10–U2–O13 <sup>#4</sup>                | 73.4(3)           |
| O3–U1–O4                  | 52.9(3)  | O7–U2–O13                             | 88.5(4)   | O11 <sup>#3</sup> –U2–O13               | 84.1(3)           |
| O3–U1–O5 <sup>#1</sup>    | 126.1(3) | O7–U2–O13 <sup>#4</sup>               | 92.6(4)   | O11 <sup>#3</sup> –U2–O13 <sup>#4</sup> | 153.5(3)          |
| O3–U1–O6 <sup>#2</sup>    | 153.4(3) | O8–U2–O9                              | 88.1(4)   | O13–U2–O13 <sup>#4</sup>                | 69.4(4)           |
| Hydrogen bonding contacts |          |                                       |           |                                         |                   |
| D–H                       | d(D–H)   | d(H···A)                              | ∠DHA      | d(D···A)                                | A                 |
| N1–H12                    | 0.86     | 2.51                                  | 145       | 3.248                                   | O7 <sup>#5</sup>  |
| N1–H13                    | 0.86     | 2.58                                  | 142       | 3.308                                   | O11 <sup>#6</sup> |
| N2–H22                    | 0.86     | 2.62                                  | 118       | 3.115                                   | O2 <sup>#7</sup>  |
| O13–H132                  | 0.84     | 2.46                                  | 180       | 3.304                                   | O3 <sup>#8</sup>  |

<sup>a</sup> Symmetry codes: #1 =  $-x-3, -y-3, -z+1$ ; #2 =  $x, y+1, z$ ; #3 =  $-x-2, -y-2, -z$ ; #4 =  $-x-1, -y-1, -z$ ; #5 =  $x-1, y-1, z$ ; #6 =  $x, y-1, z$ ; #7 =  $-x+1, -y+1, -z+1$ ; #8 =  $-x+1, -y+1, -z$ .

**Table S4** Selected Interatomic Distances (Å) and Bond Angles (°) for **4**<sup>a</sup>

|                           |           |                       |           |                                      |                  |
|---------------------------|-----------|-----------------------|-----------|--------------------------------------|------------------|
| U–O1                      | 1.766(13) | U–O4 <sup>#1</sup>    | 2.450(8)  | U–O9                                 | 2.323(9)         |
| U–O2                      | 1.763(13) | U–O5 <sup>#2</sup>    | 2.478(10) |                                      |                  |
| U–O3                      | 2.250(8)  | U–O6 <sup>#2</sup>    | 2.347(11) |                                      |                  |
| O1–U–O2                   | 179.7(5)  | O2–U–O4 <sup>#1</sup> | 89.8(5)   | O3–U–O7 <sup>#3</sup>                | 82.7(3)          |
| O1–U–O3                   | 89.4(4)   | O2–U–O5 <sup>#1</sup> | 88.2(6)   | O4 <sup>#1</sup> –U–O5 <sup>#2</sup> | 52.5(3)          |
| O1–U–O4 <sup>#1</sup>     | 90.2(5)   | O2–U–O6 <sup>#2</sup> | 91.0(5)   | O4 <sup>#1</sup> –U–O6 <sup>#2</sup> | 124.8(3)         |
| O1–U–O5 <sup>#1</sup>     | 92.0(5)   | O2–U–O7 <sup>#3</sup> | 90.0(5)   | O4 <sup>#1</sup> –U–O7 <sup>#3</sup> | 156.8(3)         |
| O1–U–O6 <sup>#2</sup>     | 89.3(5)   | O3–U–O4 <sup>#1</sup> | 74.2(3)   | O5 <sup>#2</sup> –U–O6 <sup>#2</sup> | 72.3(3)          |
| O1–U–O7 <sup>#3</sup>     | 90.0(5)   | O3–U–O5 <sup>#1</sup> | 126.7(3)  | O5 <sup>#2</sup> –U–O7 <sup>#3</sup> | 150.6(3)         |
| O2–U–O3                   | 90.3(5)   | O3–U–O6 <sup>#2</sup> | 131.0(4)  | O6 <sup>#2</sup> –U–O7 <sup>#3</sup> | 78.4(4)          |
| Hydrogen bonding contacts |           |                       |           |                                      |                  |
| D–H                       | d(D–H)    | d(H⋯A)                | ∠DHA      | d(D⋯A)                               | A                |
| O6–H61                    | 0.84      | 2.01                  | 177       | 2.847                                | O5 <sup>#4</sup> |
| O8–H81                    | 0.84      | 2.09                  | 160       | 2.898                                | O3               |

<sup>a</sup> Symmetry codes: #1 =  $-x+0.5, y+0.5, -z+0.5$ ; #2 =  $x, 1-y, z-0.5$ ; #3 =  $-x, y, -z+0.5$ ; #4 =  $-x+0.5, -y+0.5, -z+1$ .
